# Supplementary material for: Anesthetic management of patients with class 3 obesity undergoing elective Cesarean delivery: a single-centre historical cohort study
Source: Springer Nature journal article supplement (doi:10.1007/s12630-022-02365-3), 2022-11-29

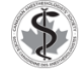

---

## ELECTRONIC SUPPLEMENTARY MATERIAL

### **Van den Bosch OFC *et al.*: Anesthetic management of patients with class 3 obesity undergoing elective Cesarean delivery: a single-centre historical cohort study**

***Disclaimer:** Electronic Supplementary Material (ESM) is supplied by the authors for the benefit of readers. This feature is intended to provide additional information, context, and/or dimension to complement articles. Readers should be aware that unlike the main print manuscript, ESM may not undergo extensive peer review and typically is posted as supplied by the authors without editing, proofreading, accuracy checking, copyediting, or typesetting; it is published online only.*

#### TABLE OF CONTENTS

**eFigure**      Flow diagram identifying 396 elective Cesarean deliveries for patients with class 3 obesity between July 2014 and December 2020

**eFigure**

Flow diagram identifying 396 elective Cesarean deliveries for patients with class 3 obesity between July 2014 and December 2020

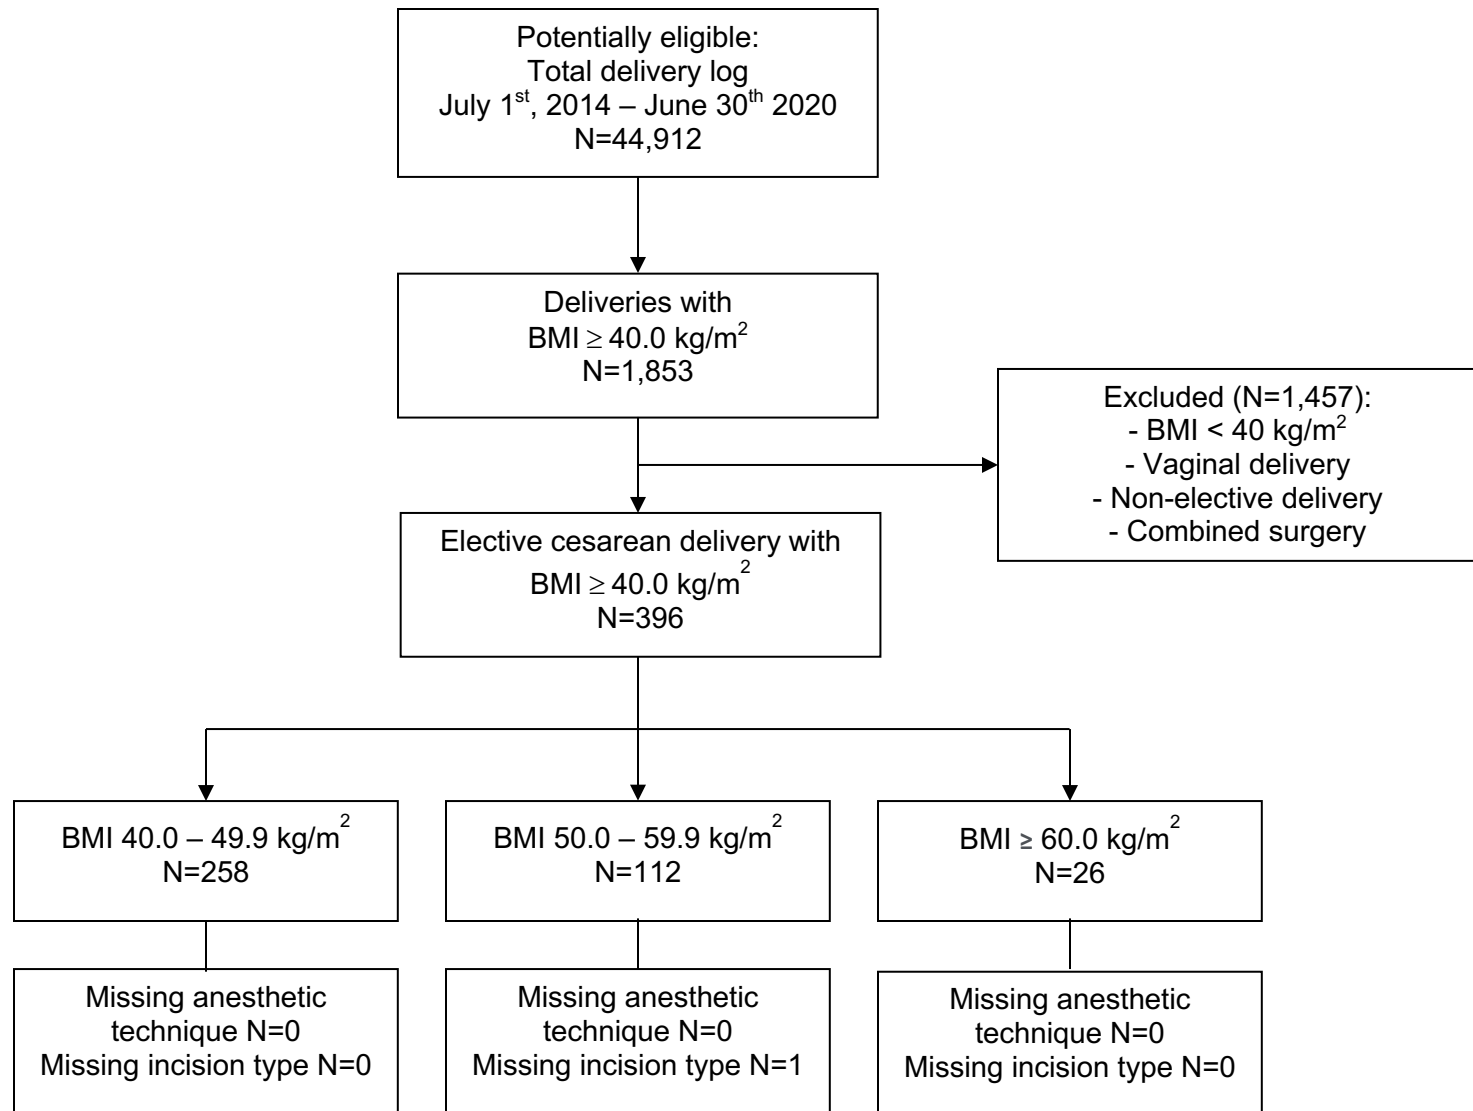

Supplement: MOESM1 [file 23768916]
